# Supplementary material for: Consumption of a Western-Style Diet Modulates the Response of the Murine Gut Microbiome to Ciprofloxacin
Source: PubMed Central journal article supplement (PMC7394352; doi:10.1128/msystems.00317-20), 2020-07-28

**A**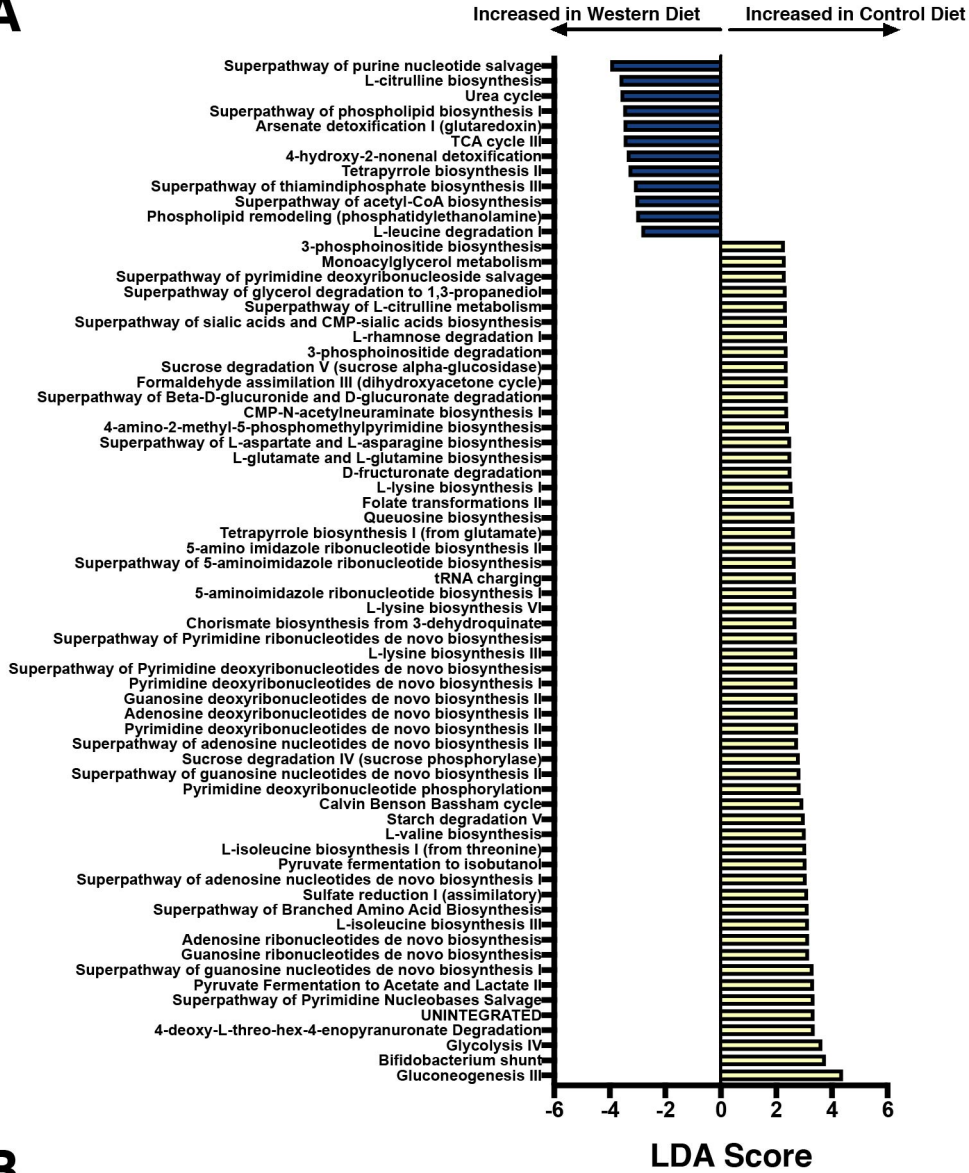**B**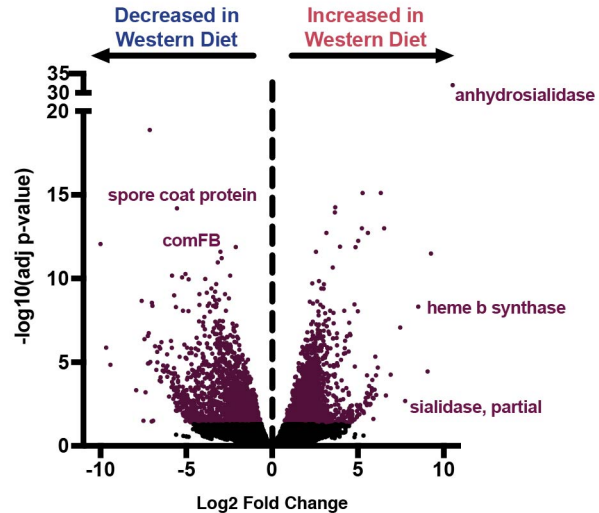

Supplement: mSystems.00317-20-sf002.pdf [file mSystems.00317-20-sf002.pdf]
