# Supplementary material for: Consumption of a Western-Style Diet Modulates the Response of the Murine Gut Microbiome to Ciprofloxacin
Source: PubMed Central journal article supplement (PMC7394352; doi:10.1128/msystems.00317-20), 2020-07-28

**A**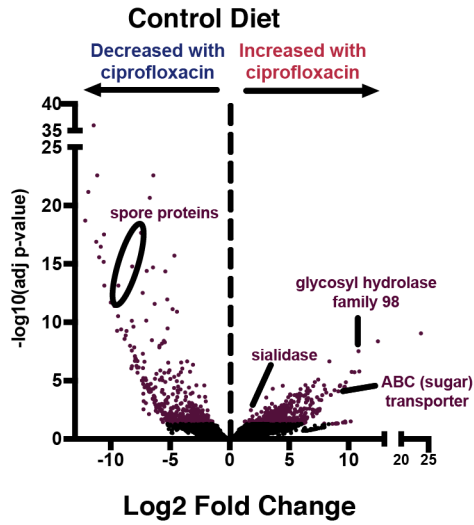**B**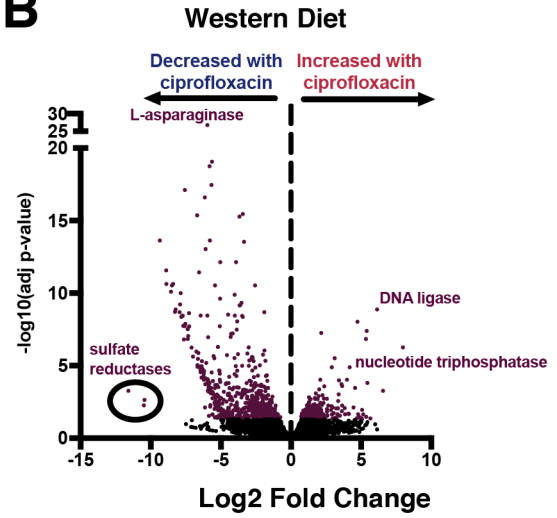**C**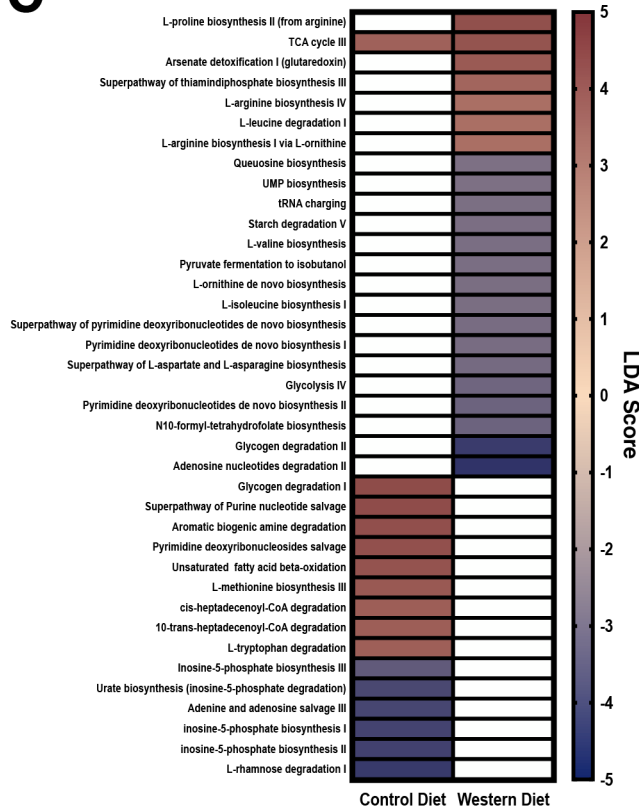**CAZyme Class**

- Glycoside Hydrolase
- Glycosyltransferase
- Polysaccharide Lyase
- Carbohydrate Binding
- Carbohydrate Esterase
- Auxiliary Activity

**Substrate & Linkage**

- Plant
- Animal
- Microbe
- Alpha
- Beta

**D**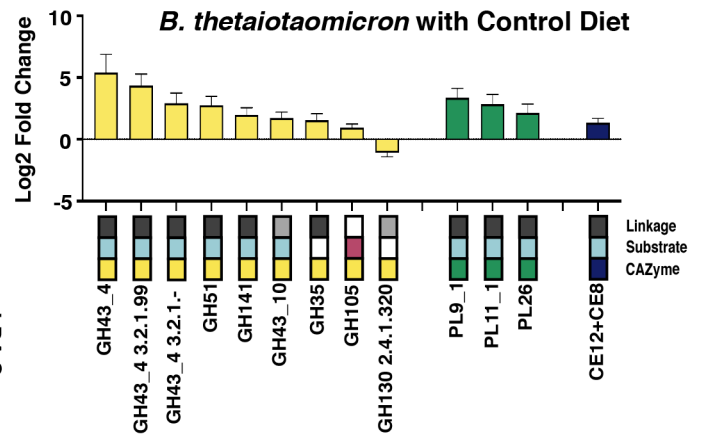**E**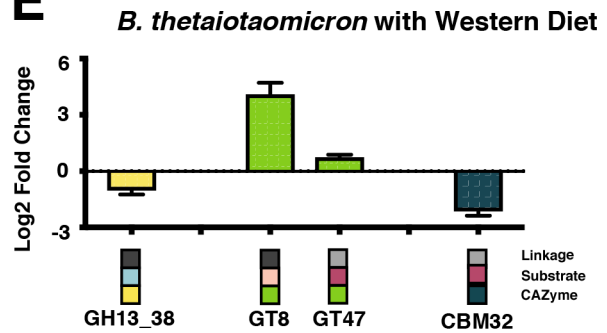**F**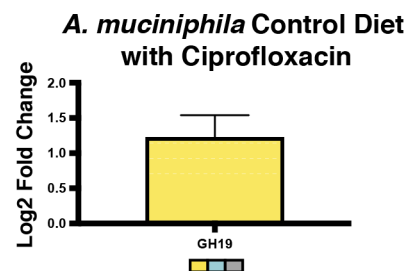

Supplement: mSystems.00317-20-sf003.pdf [file mSystems.00317-20-sf003.pdf]
